# Supplementary material
Source: publisher figshare collection journal article supplement (https://gsajournals.figshare.com/ndownloader/files/29162175)
Supplement: Supplementary file 1 [file 29162175]

## Sheet: Info
Parent	Effect signal
Brandes	positive (+)
Wray	negative (-)
Trait	Description
FLW	days to flowering
HGH	plant height, in cm
FBY	fresh biomass yield, in t/ha
JUC	juice extraction yield, in %
BRX	total soluble solids, in °Brix
SUC	sucrose content, in %
RSU	reducing sugar content, in %
FIB	fibers, in %
Trial	Year
T1	2010
T2	2011/12
T3	2013/14
Abbreviation	Description
Chr.	chromosome
SE	standard error
VarCov (%)	ratio of the sum of variance and covariances of the QTL effect to the phenotypic variance, times 100
Var (%)	ratio of the variance of the QTL effect to the phenotypic variance, times 100
ep-value	empirical p-value estimated via score statistics resampling
sur	seemingly unrelated regression (zero effect)
Mbp	mega base pairs
cM	centiMorgans

## Sheet: MT
Trait	QTL	Chr.	Position (Mbp)	LOD	Marker	T1						T2						T3						Trial	Intercept	SE	R-squared	Adjusted R-squared	Genotypic correlation			Phenotypic correlation
						Effect	SE	VarCov (%)	Var (%)	LOD	ep-value	Effect	SE	VarCov (%)	Var (%)	LOD	ep-value	Effect	SE	VarCov (%)	Var (%)	LOD	ep-value						T1	T2	T3	T1	T2	T3
FLW	1	1	3.97	11.67	sb1_3970020	-0.849071	0.160216	8.92747	7.76523	5.74	0	-1.64543	0.397108	4.10588	3.33357	3.6	0	-2.31042	0.326088	8.65451	7.3541	9.82	0	T1	73.2748	0.164178	0.413064	0.396214	1	0.792212	0.748231	1	0.629237	0.577089
	2	1	65.29	10.03	sb1_65286796	1.05164	0.151542	11.9241	12.0651	9.44	0	1.71017	0.383254	3.20492	3.64723	4.14	0	sur	sur	sur	sur	sur	sur	T2	98.3533	0.404254	0.586382	0.574508	0.792212	1	0.948701	0.629237	1	0.713837
	3	4	60.38	6.23	sb4_60384430	-0.548768	0.159926	1.81584	3.29209	2.49	0.00075	-1.48785	0.396395	0.992993	2.76631	2.96	0	-1.57995	0.324817	1.17452	3.4903	4.88	0	T3	89.6131	0.333581	0.690345	0.681455	0.748231	0.948701	1	0.577089	0.713837	1
	4	6	0.56	14.51	sb6_556374	-0.695448	0.160074	3.10897	5.27628	3.92	0	-2.48425	0.400577	5.77768	7.69619	7.7	0	-2.5396	0.326774	6.91387	8.99932	11.63	0
	5	6	40.5	50.41	sb6_40503618	0.991682	0.162403	9.35357	10.4044	7.46	0	5.62093	0.40412	37.0937	38.2096	30.04	0	5.86597	0.330847	45.2566	46.5619	42.33	0
	6	8	32.22	5.34	sb8_32219639	-0.568711	0.142299	3.79114	3.49198	3.35	0	sur	sur	sur	sur	sur	sur	-1.26679	0.31201	1.90263	2.21604	3.45	0.00025
	7	10	46.36	7.01	sb10_46359419	sur	sur	sur	sur	sur	sur	-1.57481	0.35648	4.82878	3.10337	4.06	0	-1.40283	0.309099	4.44376	2.7554	4.28	0
HGH	1	1	67.15	6.64	sb1_67145124	4.42079	1.17303	4.72633	4.10372	2.99	0	7.41854	1.31728	6.04682	6.02199	6.43	0	sur	sur	sur	sur	sur	sur	T1	228.774	1.29841	0.236348	0.229178	1	0.575585	0.647006	1	0.626256	0.531442
	2	3	68.23	8.26	sb3_68228805	sur	sur	sur	sur	sur	sur	sur	sur	sur	sur	sur	sur	-8.05351	1.24993	10.7864	9.2784	8.26	0	T2	248.689	1.52758	0.46945	0.459392	0.575585	1	0.681393	0.626256	1	0.599163
	3	6	42.2	21.47	sb6_42204455	sur	sur	sur	sur	sur	sur	13.4592	1.22473	17.2229	18.6986	20.8	0	7.26973	1.31075	6.28413	7.43047	6.24	0	T3	310.456	1.47039	0.354382	0.345246	0.647006	0.681393	1	0.531442	0.599163	1
	4	9	10.16	12.87	sb9_10163280	-8.87824	1.3006	17.1739	16.5513	9.18	0	-8.00246	1.52073	7.80177	7.00731	5.72	0	-10.2172	1.43108	16.358	15.5588	9.98	0
	5	10	36.25	9.08	sb10_36250174	sur	sur	sur	sur	sur	sur	-7.95195	1.17103	8.67649	6.92861	9.08	0	sur	sur	sur	sur	sur	sur
FBY	1	1	66.87	6.46	sb1_66869596	1.69316	0.366335	7.73511	7.61781	4.42	0	2.06399	0.409588	6.03899	6.18198	5.22	0	sur	sur	sur	sur	sur	sur	T1	24.2668	0.37542	0.200789	0.189479	1	0.69725	0.382235	1	0.519349	0.238837
	2	6	40.06	19.13	sb6_40060810	sur	sur	sur	sur	sur	sur	3.83285	0.376106	20.0197	21.1836	18.33	0	3.28502	0.705265	8.21133	7.71398	4.49	0	T2	31.0251	0.434296	0.427354	0.416498	0.69725	1	0.816987	0.519349	1	0.463848
	3	9	2.96	6.57	sb9_2964966	-1.49916	0.369576	6.65727	6.09816	3.44	0	-2.25662	0.415481	7.01473	7.54563	6.02	0	sur	sur	sur	sur	sur	sur	T3	54.5046	0.71739	0.2101	0.202683	0.382235	0.816987	1	0.238837	0.463848	1
	4	10	32.79	10.43	sb10_32791595	-1.19451	0.373275	4.64596	3.85451	2.18	0	-2.47054	0.428087	10.9771	9.00435	6.74	0	-4.22962	0.707975	13.5807	13.0834	7.17	0
JUC	1	1	6.47	7.17	sb1_6473213	sur	sur	sur	sur	sur	sur	0.688271	0.132007	8.70669	8.79134	5.56	0	0.574956	0.138062	5.2177	4.40933	3.63	0	T1	51.3023	0.194305	0.10479	0.0963848	1	-0.250653	-0.137252	1	0.215025	0.263951
	2	3	47.72	6.12	sb3_47721891	sur	sur	sur	sur	sur	sur	sur	sur	sur	sur	sur	sur	0.735125	0.133844	6.98901	7.24088	6.12	0	T2	59.3789	0.142437	0.202903	0.191623	-0.250653	1	0.415094	0.215025	1	0.452296
	3	5	4.78	6.1	sb5_4780572	sur	sur	sur	sur	sur	sur	0.699702	0.127734	8.11328	9.03822	6.1	0	sur	sur	sur	sur	sur	sur	T3	66.8649	0.151981	0.346923	0.334543	-0.137252	0.415094	1	0.263951	0.452296	1
	4	5	56.63	4.62	sb5_56630015	0.825629	0.174808	6.6027	7.49592	4.62	0	sur	sur	sur	sur	sur	sur	sur	sur	sur	sur	sur	sur
	5	6	46.18	8.35	sb6_46177115	sur	sur	sur	sur	sur	sur	sur	sur	sur	sur	sur	sur	-0.869058	0.133938	10.0825	10.074	8.35	0
	6	9	10.12	8.06	sb9_10123156	sur	sur	sur	sur	sur	sur	sur	sur	sur	sur	sur	sur	0.843125	0.132407	9.85375	9.63057	8.06	0
	7	10	20.15	9.32	sb10_20145976	-0.83338	0.178031	6.73688	7.6301	4.55	0	0.491064	0.130821	4.55058	4.53763	2.97	0.00025	sur	sur	sur	sur	sur	sur
BRX	1	1	6.55	10.6	sb1_6554130	-0.298753	0.0774703	2.87102	2.18315	3.12	0.00025	sur	sur	sur	sur	sur	sur	-0.549715	0.0866566	7.5522	8.44379	8.02	0	T1	11.7773	0.0830892	0.668492	0.652321	1	0.640558	0.666101	1	0.540187	0.481845
	2	1	66.18	7.74	sb1_66179567	0.464032	0.0789814	5.98935	5.28138	6.96	0	0.305655	0.0840019	3.33427	3.01037	2.79	0.00025	sur	sur	sur	sur	sur	sur	T2	13.3371	0.0937092	0.426938	0.413293	0.640558	1	0.206471	0.540187	1	0.453631
	3	3	32.93	14.53	sb3_32929037	-0.559976	0.0772428	7.50313	7.69115	10.21	0	sur	sur	sur	sur	sur	sur	-0.442495	0.0864526	5.76889	5.48622	5.38	0	T3	14.5805	0.0978088	0.496432	0.47697	0.666101	0.206471	1	0.481845	0.453631	1
	4	3	66.44	25.19	sb3_66439364	-0.974314	0.0806958	24.377	22.7145	24.26	0	-0.505215	0.0923104	8.59193	8.0235	6.11	0	-0.366025	0.0927	4.50866	3.6621	3.28	0
	5	4	20.86	8.73	sb4_20858301	-0.440157	0.0765235	3.40119	4.74334	6.68	0	sur	sur	sur	sur	sur	sur	-0.292621	0.0857591	1.65621	2.39489	2.46	0.00075
	6	5	3.33	6.82	sb5_3332301	-0.41721	0.0800196	4.17138	4.25763	5.56	0	-0.335438	0.0850486	2.7178	3.61569	3.27	0.00025	sur	sur	sur	sur	sur	sur
	7	6	12.2	17.93	sb6_12197160	sur	sur	sur	sur	sur	sur	0.700621	0.0888933	14.2446	15.1659	11.84	0	-0.273549	0.0953048	0.730226	2.01033	1.75	0.005
	8	6	52.51	12.69	sb6_52508321	0.315528	0.0775937	2.43287	2.38222	3.46	0	sur	sur	sur	sur	sur	sur	0.630132	0.0880881	10.1033	10.8535	9.98	0
	9	8	45.41	7.09	sb8_45414023	-0.407116	0.078796	3.29166	3.9129	5.47	0	sur	sur	sur	sur	sur	sur	0.256499	0.0880623	1.86115	1.77434	1.81	0.0035
	10	9	2.96	10.66	sb9_2961942	-0.337678	0.0816223	4.28045	2.7891	3.59	0	-0.604577	0.0857685	12.0533	11.7454	9.76	0	sur	sur	sur	sur	sur	sur
	11	9	47.19	12.66	sb9_47191574	-0.359513	0.0776459	3.83048	3.14921	4.44	0	sur	sur	sur	sur	sur	sur	-0.579051	0.0859468	8.55011	9.33282	8.97	0
SUC	1	1	1.92	8.95	sb1_1922310	-0.424864	0.0905554	6.21449	4.97053	4.55	0	-0.307314	0.0936027	3.90827	3.15424	2.28	0.001	-0.603505	0.100984	9.91849	9.96333	7.16	0	T1	5.9404	0.0910651	0.522407	0.511035	1	0.832456	0.759239	1	0.521071	0.500671
	2	1	63.06	6.45	sb1_63062369	0.41741	0.0863112	5.66599	4.76476	4.82	0	0.337813	0.0875272	4.07973	3.78525	3.13	0	sur	sur	sur	sur	sur	sur	T2	7.92562	0.0949224	0.38115	0.363384	0.832456	1	0.678284	0.521071	1	0.511999
	3	3	15.56	12.85	sb3_15556960	-0.598751	0.0902982	9.16444	9.78801	8.69	0	-0.31407	0.0936383	3.50261	3.26648	2.38	0	-0.670724	0.100871	9.8027	12.2019	8.72	0	T3	10.031	0.100736	0.415466	0.401549	0.759239	0.678284	1	0.500671	0.511999	1
	4	3	66.81	19.87	sb3_66807772	-0.942177	0.0910662	25.1717	24.0351	18.88	0	-0.519233	0.0941485	9.21502	8.85387	6.18	0	-0.343388	0.101063	3.70405	3.17169	2.44	0
	5	4	63.08	6.8	sb4_63077574	sur	sur	sur	sur	sur	sur	sur	sur	sur	sur	sur	sur	-0.538835	0.0928416	5.58007	7.94315	6.8	0
	6	6	43.23	8.64	sb6_43234162	sur	sur	sur	sur	sur	sur	0.573162	0.0867211	9.7816	10.701	8.64	0	sur	sur	sur	sur	sur	sur
	7	9	9.92	11.17	sb9_9924409	-0.450773	0.0901959	6.11638	5.59382	5.13	0	-0.48525	0.0934616	7.67254	7.86229	5.52	0	-0.642029	0.0997645	11.3446	11.273	8.22	0
RSU	1	1	6.82	6.65	sb1_6821255	sur	sur	sur	sur	sur	sur	sur	sur	sur	sur	sur	sur	0.0555844	0.00968876	10.8728	10.6597	6.65	0	T1	2.28409	0.0185634	0.473394	0.463411	1	0.663617	0.654319	1	0.277797	0.338603
	2	3	45.24	8.98	sb3_45235825	0.0966688	0.0178533	6.61199	6.87572	5.97	0	sur	sur	sur	sur	sur	sur	0.0432744	0.00970523	6.04083	6.44699	4.13	0	T2	2.00041	0.0168589	0.0466649	0.04221	0.663617	1	0.335517	0.277797	1	0.259432
	3	3	66.81	12.51	sb3_66810353	0.129926	0.0180018	11.071	12.3264	10.13	0	sur	sur	sur	sur	sur	sur	0.0420882	0.00978895	5.84824	6.05223	3.85	0	T3	1.24936	0.0100222	0.278131	0.264446	0.654319	0.335517	1	0.338603	0.259432	1
	4	4	0.44	15.72	sb4_439184	0.164039	0.0181386	20.3356	20.0883	15.03	0	0.0548187	0.0168589	4.66649	4.66649	2.24	0	0.0302243	0.00979174	3.04459	3.19085	2.02	0.005
	5	6	42	6.77	sb6_42000837	0.102811	0.0177519	8.7261	7.73934	6.77	0	sur	sur	sur	sur	sur	sur	sur	sur	sur	sur	sur	sur
FIB	1	1	58.99	5.82	sb1_58990711	sur	sur	sur	sur	sur	sur	0.214653	0.053521	4.55847	4.96951	3.37	0	0.232853	0.0481992	5.8384	5.92465	4.81	0	T1	16.5801	0.111318	0.0829308	0.0786454	1	0.494783	0.581821	1	0.39814	0.315433
	2	3	66.43	11.39	sb3_66431004	0.49198	0.111318	8.29309	8.29309	4.06	0	0.239411	0.0559445	5.82576	6.22916	3.81	0	0.366653	0.0501841	13.8372	14.8015	10.32	0	T2	11.3246	0.0582587	0.266513	0.252608	0.494783	1	0.488693	0.39814	1	0.489285
	3	6	34.86	13.72	sb6_34859585	sur	sur	sur	sur	sur	sur	-0.255239	0.0547666	6.62042	6.79913	4.49	0	0.235048	0.049576	5.44519	5.84162	4.63	0	T3	11.6333	0.0521651	0.404804	0.390633	0.581821	0.488693	1	0.315433	0.489285	1
	4	8	8.32	6.64	sb8_8319850	sur	sur	sur	sur	sur	sur	0.223865	0.0546728	5.25122	5.40523	3.51	0	0.261278	0.0492608	6.81636	7.45939	5.75	0
	5	9	10.12	6.83	sb9_10123156	sur	sur	sur	sur	sur	sur	sur	sur	sur	sur	sur	sur	-0.261402	0.0449136	6.27538	7.62354	6.83	0

## Sheet: T1
Trait	QTL	Chr.	Position (Mbp)	LOD	Marker	Effect	SE	VarCov (%)	Var (%)	LOD	ep-value	Intercept	SE	R-squared	Adjusted R-squared
FLW	1	1	12.2	10.09	sb1_12204777	-1.04471	0.145118	11.6128	11.5868	10.09	0	73.1536	0.145306	0.518483	0.507018
	2	1	65.12	12.33	sb1_65121629	1.17539	0.145849	14.6732	15.1235	12.33	0
	3	6	0.18	5.7	sb6_181001	-0.763843	0.144607	4.23667	6.38322	5.7	0
	4	6	41.6	12.23	sb6_41596558	1.15413	0.143878	12.5467	14.5616	12.23	0
	5	9	3.22	7.43	sb9_3219616	-0.881012	0.144707	8.77885	8.4917	7.43	0
HGH	1	1	66.87	8.23	sb1_66869594	7.11726	1.10555	12.2395	10.3554	8.23	0	226.548	1.11832	0.47753	0.465091
	2	2	26.27	5.81	sb2_26266533	-5.82888	1.09211	6.82967	6.9456	5.81	0
	3	4	57.35	5.05	sb4_57348634	-5.38381	1.08594	5.80117	5.96094	5.05	0
	4	9	10.14	12.04	sb9_10142521	-8.65033	1.08779	17.2078	15.6477	12.04	0
	5	10	55.79	5.28	sb10_55791582	-5.46654	1.07731	5.6746	6.26999	5.28	0
FBY	1	8	6.44	4.25	sb8_6435535	-1.72751	0.381609	7.89748	7.79404	4.25	0	24.3896	0.383587	0.178602	0.17089
	2	10	44.57	5.32	sb10_44571346	-1.91216	0.37556	9.9628	9.85935	5.32	0
JUC	1	7	60.89	4.29	sb7_60890829	-0.854008	0.187843	7.99069	8.00352	4.29	0	51.5132	0.1905	0.163621	0.155767
	2	10	27.12	4.48	sb10_27118480	-0.884617	0.190107	8.3714	8.38423	4.48	0
BRX	1	1	4.06	6.74	sb1_4060794	-0.502391	0.086935	6.42373	6.18427	6.74	0	11.8081	0.0879127	0.601088	0.589636
	2	1	66.18	7.01	sb1_66179567	0.517106	0.0876175	6.67557	6.5586	7.01	0
	3	3	19.72	9.52	sb3_19715944	-0.612435	0.0878432	8.45555	9.06948	9.52	0
	4	3	66.81	21.86	sb3_66807788	-0.987472	0.087201	24.2719	23.7588	21.86	0
	5	4	18.92	5.2	sb4_18924798	-0.437732	0.0870002	5.15907	4.69766	5.2	0
	6	9	47.83	8.31	sb9_47827121	-0.566029	0.0874662	9.12296	7.84416	8.31	0
SUC	1	1	4.06	10.27	sb1_4060794	-0.605609	0.083305	8.41709	10.0863	10.27	0	5.93283	0.0838791	0.607318	0.596044
	2	3	15.57	13.92	sb3_15570616	-0.718313	0.0831501	10.7815	14.1312	13.92	0
	3	3	66.81	24.03	sb3_66807788	-0.987629	0.0821589	25.5359	26.6749	24.03	0
	4	4	55.95	5.55	sb4_55954335	0.435814	0.0836467	3.58129	5.17625	5.55	0
	5	7	13.11	5.67	sb7_13105794	0.438331	0.083193	3.18285	5.21444	5.67	0
	6	9	10.32	8.64	sb9_10321716	-0.547244	0.0827842	9.23339	8.01806	8.64	0
RSU	1	3	12.13	5.42	sb3_12127165	0.0871411	0.0169408	5.56177	5.66883	5.42	0	2.28471	0.0173481	0.539966	0.529013
	2	3	66.39	14.34	sb3_66394036	0.151166	0.0172002	14.5317	16.5867	14.34	0
	3	4	0.44	18.13	sb4_439184	0.171802	0.0170194	21.298	22.0346	18.13	0
	4	4	47.89	4.37	sb4_47891430	0.0796955	0.0173572	5.24479	4.6927	4.37	0
	5	6	42	5.12	sb6_42000837	0.0871401	0.0174498	7.36062	5.55983	5.12	0
FIB	1	1	4.64	4.42	sb1_4635552	0.463007	0.100276	7.65715	7.30928	4.42	0	16.5969	0.101346	0.261351	0.250899
	2	3	68.11	5.98	sb3_68106616	0.540306	0.0996601	10.6534	10.0789	5.98	0
	3	10	58.08	4.68	sb10_58078779	0.476084	0.100042	7.82451	7.74758	4.68	0

## Sheet: T2
Trait	QTL	Chr.	Position (Mbp)	LOD	Marker	Effect	SE	VarCov (%)	Var (%)	LOD	ep-value	Intercept	SE	R-squared	Adjusted R-squared
FLW	1	1	67.22	6.81	sb1_67221907	2.30592	0.396794	4.41701	6.65374	6.81	0	98.5378	0.404999	0.585409	0.57755
	2	6	0.36	6.3	sb6_358948	-2.26632	0.406824	4.29981	6.42327	6.3	0
	3	6	39.89	34.38	sb6_39890117	6.17119	0.403775	42.6269	46.0569	34.38	0
	4	10	32.59	6.4	sb10_32588604	-2.26672	0.403537	7.19712	6.27494	6.4	0
HGH	1	1	0.41	4.64	sb1_413632	6.58049	1.38819	3.33444	4.74437	4.64	0	249.396	1.42842	0.547849	0.537083
	2	1	67.31	10.19	sb1_67312020	10.0795	1.39232	9.29983	11.1311	10.19	0
	3	6	42.2	16.24	sb6_42204455	13.5347	1.43184	17.3128	18.9089	16.24	0
	4	9	2.86	7.45	sb9_2858313	-8.56809	1.40546	7.89328	7.98805	7.45	0
	5	10	36.25	13.66	sb10_36250174	-11.9117	1.39421	16.9443	15.547	13.66	0
FBY	1	6	25.55	11.96	sb6_25547192	3.48682	0.440181	18.4095	17.7422	11.96	0	31.3036	0.442701	0.395196	0.386637
	2	9	2.97	5.27	sb9_2967194	-2.22349	0.43883	8.08248	7.34655	5.27	0
	3	10	12.92	7.44	sb10_12920949	-2.70827	0.444572	13.0274	10.6746	7.44	0
JUC	1	1	6.4	7.86	sb1_6397292	0.754584	0.120207	9.84591	10.567	7.86	0	59.3203	0.122195	0.430408	0.416846
	2	1	45.75	4.5	sb1_45754550	0.562637	0.120594	5.00361	5.82716	4.5	0
	3	5	4.78	11.93	sb5_4780529	0.96896	0.122523	13.6009	17.5987	11.93	0
	4	5	48.49	6.7	sb5_48494051	-0.712824	0.123775	5.16834	9.38041	6.7	0
	5	9	3.09	7.06	sb9_3092813	0.704021	0.11886	9.42214	9.35548	7.06	0
BRX	1	2	8.81	6.4	sb2_8814540	-0.453538	0.0807146	8.87765	6.42514	6.4	0	13.3066	0.0813999	0.601058	0.587632
	2	3	1.72	6.17	sb3_1718100	-0.43335	0.0786627	2.84484	5.93645	6.17	0
	3	3	68.13	10.97	sb3_68128460	-0.596733	0.0790953	10.0833	11.1228	10.97	0
	4	4	0.69	6.81	sb4_689514	0.444059	0.0764534	4.92947	6.33648	6.81	0
	5	5	4.78	12.16	sb5_4780529	-0.612635	0.0766095	9.72532	12.014	12.16	0
	6	6	34.59	12.37	sb6_34594290	0.638205	0.0790647	11.4244	12.5841	12.37	0
	7	9	2.77	12.4	sb9_2771594	-0.634098	0.0784456	12.2208	12.9205	12.4	0
SUC	1	1	6.91	5.01	sb1_6908532	-0.424138	0.0859649	5.99068	5.85984	5.01	0	7.78297	0.0869201	0.486305	0.474074
	2	3	68.96	6.61	sb3_68960782	-0.484081	0.084687	6.49918	7.82647	6.61	0
	3	5	4.78	8.75	sb5_4780529	-0.566752	0.0851429	10.1163	10.6544	8.75	0
	4	6	45.51	9.31	sb6_45509731	0.59303	0.0861369	12.1388	11.4205	9.31	0
	5	9	2.96	11.13	sb9_2961942	-0.642866	0.0845321	13.8854	13.7615	11.13	0
FIB	1	3	68.94	8.62	sb3_68937376	0.350133	0.0530305	11.7016	13.0554	8.62	0	11.3942	0.0556573	0.360121	0.34799
	2	4	9.13	4.93	sb4_9131221	-0.262687	0.0536989	5.05903	7.2337	4.93	0
	3	6	40.83	7.25	sb6_40829009	-0.318745	0.0530606	10.1529	10.7389	7.25	0
	4	8	17.1	6.92	sb8_17097463	0.307974	0.0525667	9.09883	10.2576	6.92	0

## Sheet: T3
Trait	QTL	Chr.	Position (Mbp)	LOD	Marker	Effect	SE	VarCov (%)	Var (%)	LOD	ep-value	Intercept	SE	R-squared	Adjusted R-squared
FLW	1	1	17.25	5.61	sb1_17250161	-1.70411	0.325309	5.03694	3.88456	5.61	0	89.1132	0.331175	0.697524	0.690322
	2	4	3.91	8.22	sb4_3910537	2.04363	0.31762	4.41661	5.85155	8.22	0
	3	6	0.78	11.01	sb6_781567	-2.43391	0.322018	5.42933	8.29998	11.01	0
	4	6	40.38	45.03	sb6_40375174	6.14257	0.329218	48.4158	50.2588	45.03	0
	5	10	12.58	7.34	sb10_12580068	-1.92725	0.318686	6.4538	5.20051	7.34	0
HGH	1	3	68.25	7.3	sb3_68251848	-9.14807	1.51735	13.8693	12.1036	7.3	0	311.529	1.50513	0.294192	0.287565
	2	9	48.53	8.22	sb9_48534921	-9.61403	1.49426	15.55	13.7843	8.22	0
FBY	1	2	2.08	5.92	sb2_2077382	-3.53929	0.656764	3.55178	9.10644	5.92	0	54.3111	0.641893	0.393019	0.381512
	2	3	62.49	5.35	sb3_62489080	-3.19609	0.625749	7.81926	7.52484	5.35	0
	3	6	42.31	8.54	sb6_42306469	4.17739	0.636055	10.738	12.2369	8.54	0
	4	10	43.47	12.04	sb10_43470020	-5.25934	0.661518	17.1933	19.9562	12.04	0
JUC	1	1	51.37	6.95	sb1_51368889	0.867042	0.147583	8.37903	10.1908	6.95	0	66.6078	0.145418	0.390266	0.378707
	2	3	56.76	6.15	sb3_56755689	0.803987	0.146176	8.93361	8.66099	6.15	0
	3	6	50.35	8.79	sb6_50351381	-0.984562	0.147554	10.9172	13.1327	8.79	0
	4	9	10.12	7.48	sb9_10123156	0.889483	0.145593	10.797	10.7187	7.48	0
BRX	1	1	6.64	5.84	sb1_6635744	-0.508939	0.0951281	8.72596	7.17039	5.84	0	14.4656	0.0967019	0.465702	0.455573
	2	3	57.8	10.37	sb3_57797063	-0.69728	0.0953675	14.921	13.4302	10.37	0
	3	6	52.49	7.91	sb6_52490087	0.60367	0.0958486	10.1503	9.89806	7.91	0
	4	9	46.36	10.33	sb9_46360231	-0.688299	0.0943311	12.7731	13.2606	10.33	0
SUC	1	1	6.55	11.6	sb1_6554132	-0.710342	0.0912516	12.2014	13.7747	11.6	0	10.0325	0.0937955	0.514667	0.503112
	2	3	61.74	12.6	sb3_61735295	-0.747776	0.0916321	16.208	15.1664	12.6	0
	3	6	52.44	7.5	sb6_52441613	0.571364	0.0933785	7.78182	8.59345	7.5	0
	4	9	9.09	9.83	sb9_9087685	-0.655192	0.0923489	10.8737	11.4863	9.83	0
	5	10	57.08	5.45	sb10_57081360	0.472366	0.0915756	4.40152	6.10432	5.45	0
RSU	1	1	6.82	7.57	sb1_6821255	0.059517	0.00967921	12.6136	12.2214	7.57	0	1.2675	0.0097143	0.302324	0.295774
	2	3	61.74	10.34	sb3_61735295	0.0705267	0.00966077	17.6189	17.2266	10.34	0
FIB	1	1	59.29	5.53	sb1_59286589	0.266625	0.051302	8.45651	7.90875	5.53	0	11.738	0.0518045	0.374259	0.362396
	2	3	66.43	8.61	sb3_66431004	0.340758	0.0516447	12.8599	12.7846	8.61	0
	3	8	29.45	7.07	sb8_29447278	0.304722	0.051403	9.26438	10.2459	7.07	0
	4	9	10.12	5.58	sb9_10123156	-0.267612	0.0512322	6.84514	7.99007	5.58	0
